# Supplementary material for: Comparing COVID-19 physical distancing policies: results from a physical distancing intensity coding framework for Botswana, India, Jamaica, Mozambique, Namibia, Ukraine, and the United States
Source: Springer Nature journal article supplement (doi:10.1186/s12992-021-00770-9), 2021-10-23

# Botswana

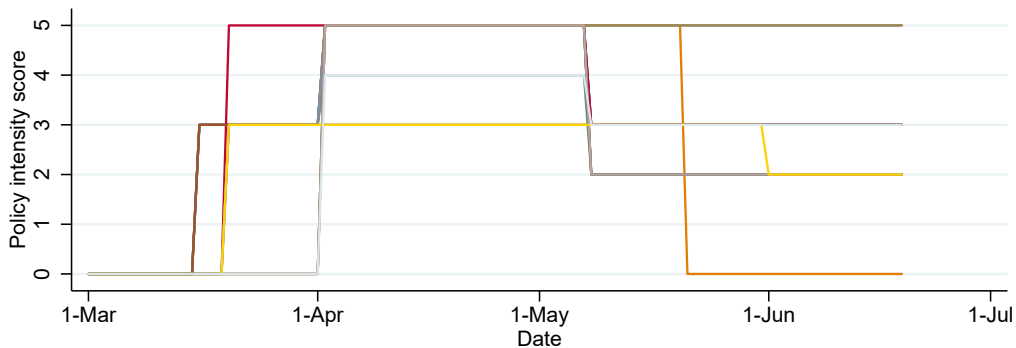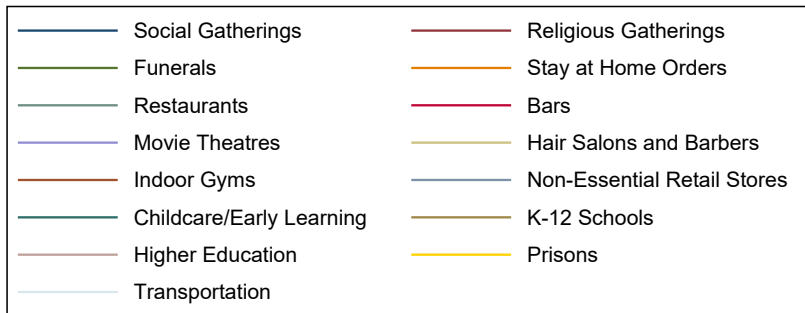

# India

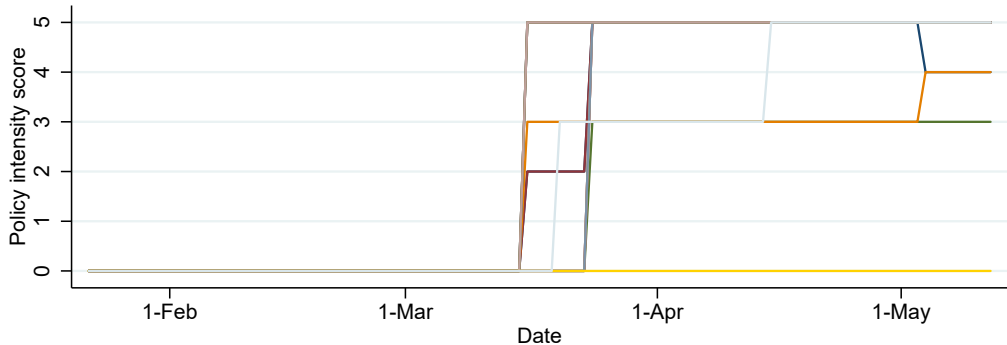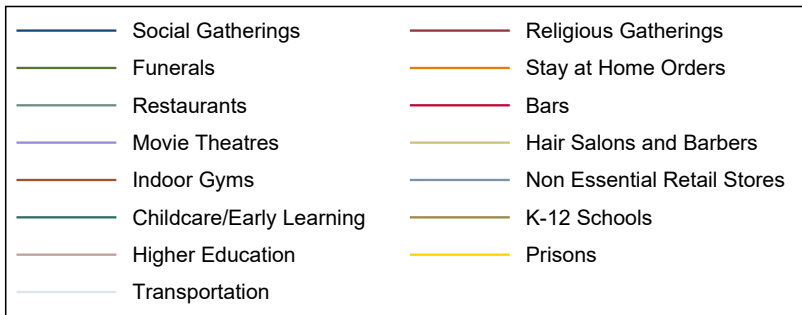

# Jamaica

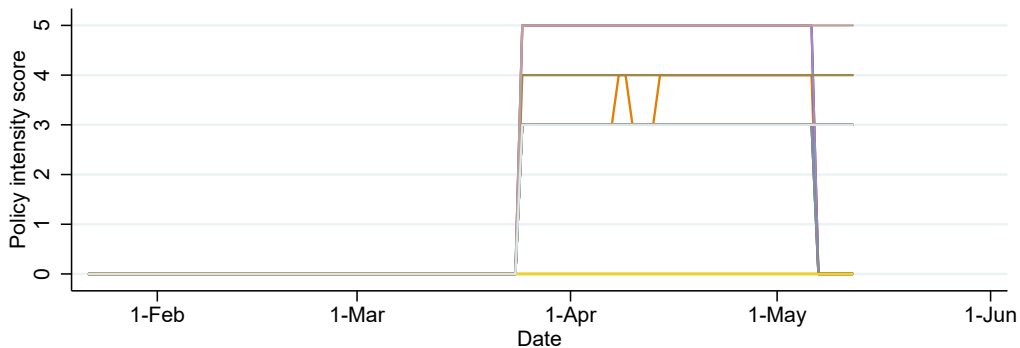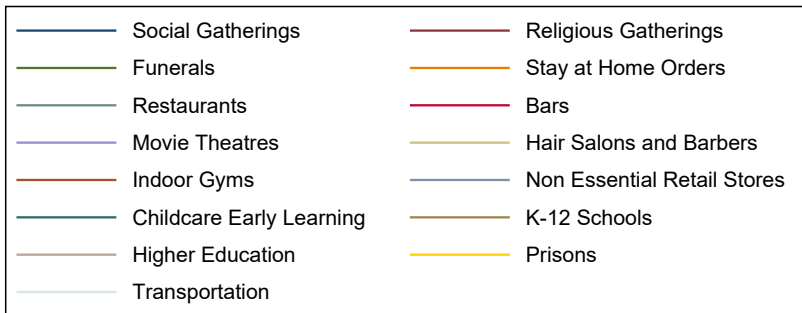

# Mozambique

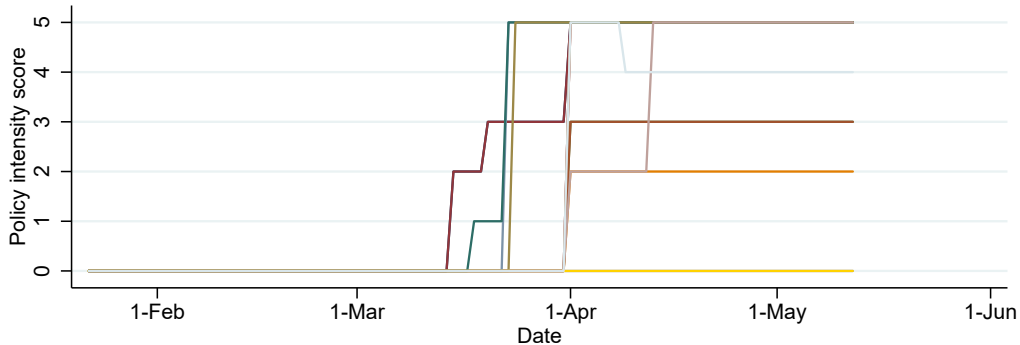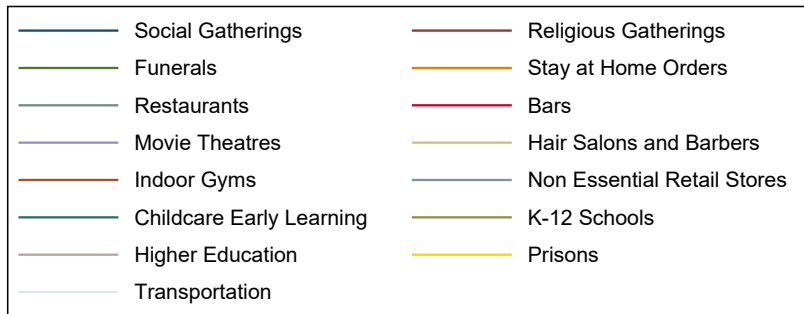

# Namibia

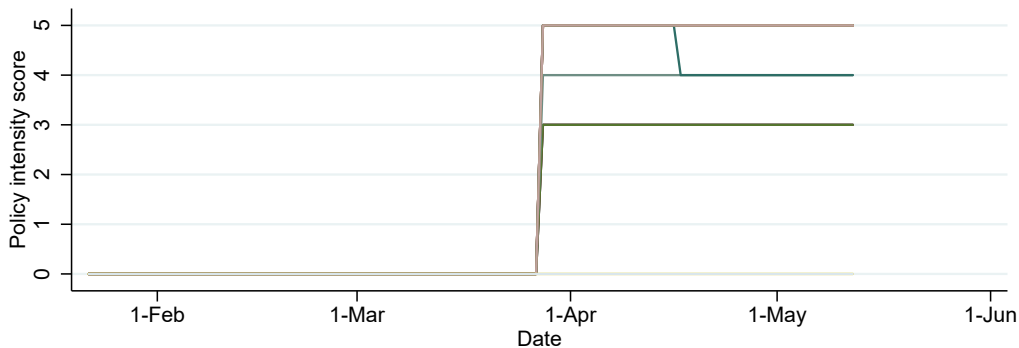

# Ukraine

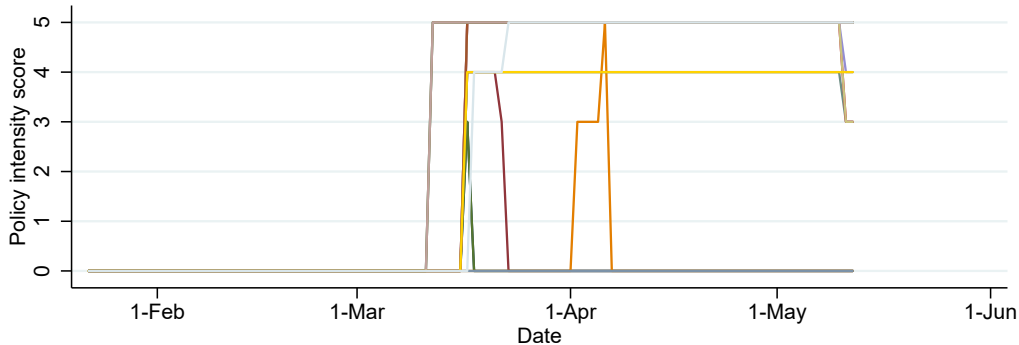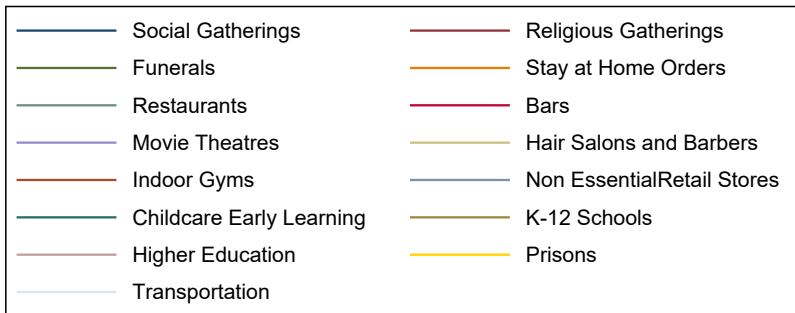

Supplement: MOESM1 [file 19787964]
